# Supplementary material
Source: Springer Nature journal article supplement (https://www.springermedizin.de/resource/supplementary/12990_2007_113_MOESM2_ESM.pdf/9612594)

**A**

Agonist response curve

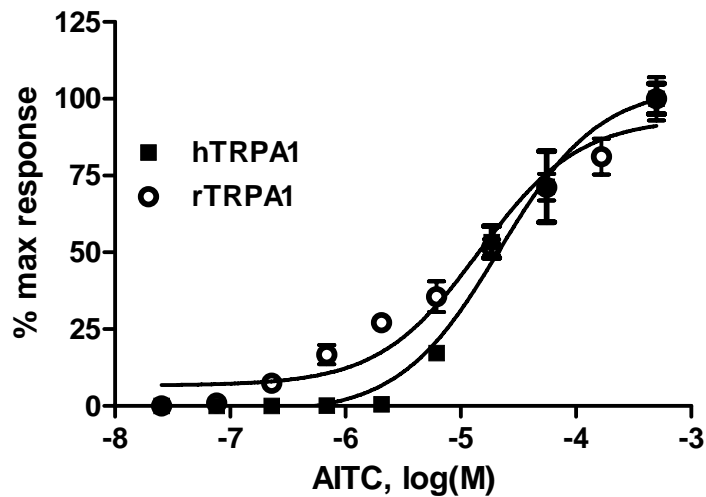**B**

ATIC activation

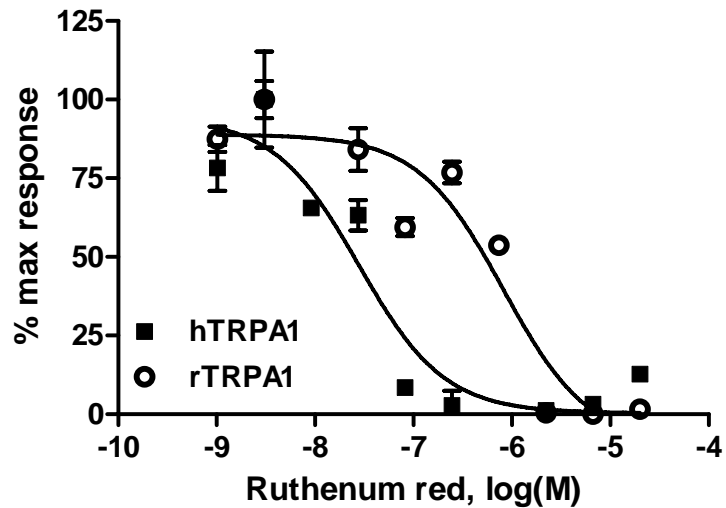**C**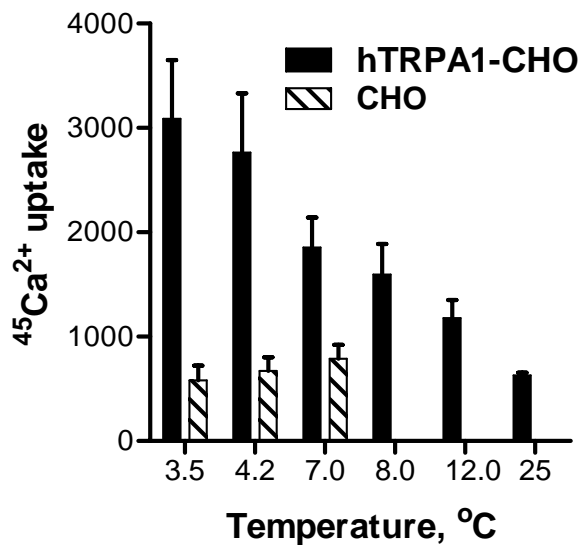**D**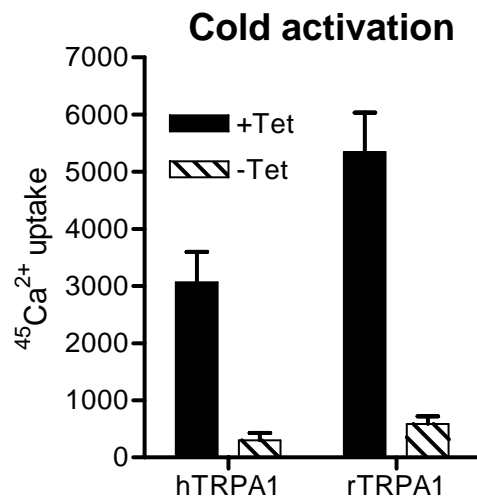**E**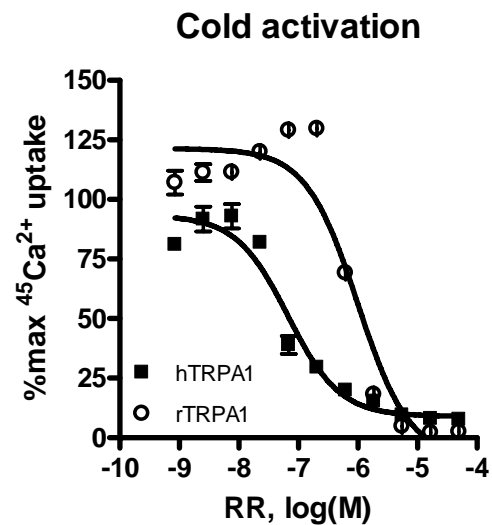

Supplement: MOESM2 [file 9612594]
